# Supplementary material
Source: publisher site journal article supplement (https://www.spandidos-publications.com/1918/downloadSupplementary)

Figure S1. Assessment of CKS2 in MCF7. Following transfection of MCF7 cells with a CENPM-overexpression vector or a control vector for 24 h, the protein expression levels of CKS2 were detected by western blotting. CENPM, centromere protein M; CKS2, cyclin-dependent kinase subunit 2.

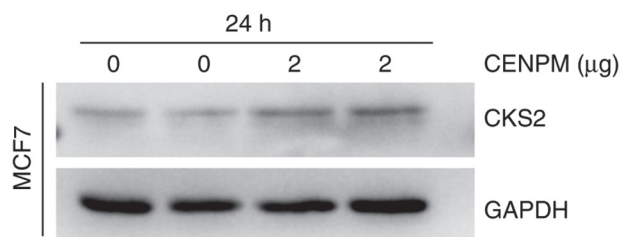

Figure S2. CENPM promotes proliferation of T-47D cells. Following transfection of T-47D cells with a CENPM-overexpression vector or a control vector for 24 h and (A) mRNA expression levels of CENPM were detected by quantitative PCR. \*\* $P < 0.01$  (n=3). (B) Viability of cells was detected by CCK-8 assay after another 24 or 48 h. \* $P < 0.05$  vs. control (n=8). CENPM, centromere protein M.

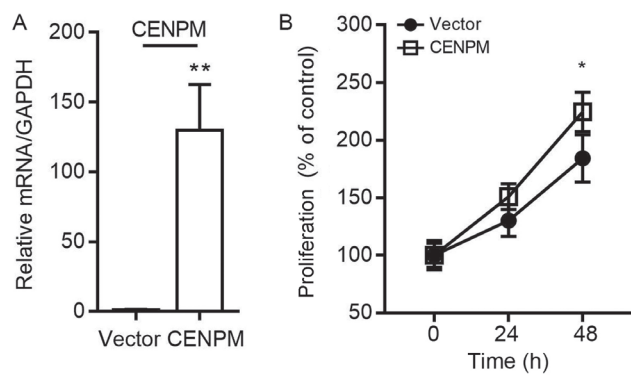

Figure S3. CENPM promotes cell proliferation. The mRNA expression levels of (A) CENPM in MCF7-vector/psi-LVRU6GP (shControl), MCF7-CENPM#a, MCF7-CENPM#b, and MCF7-CENPM#c cells, and (B) PCNA in MCF7-vector and MCF7-CENPM#a cells were detected by reverse transcription-quantitative PCR (n=3). (C) Viability of MCF7-vector/psi-LVRU6GP and MCF7-CENPM#a cells were detected by CCK-8 assay after 24 or 48 h (n=6). Dunnett's multiple comparisons test for (A); Student's t-test for (B and C). \*P<0.05. \*\*P<0.01 vs. control. CENPM, centromere protein M; PCNA, proliferating cell nuclear antigen.

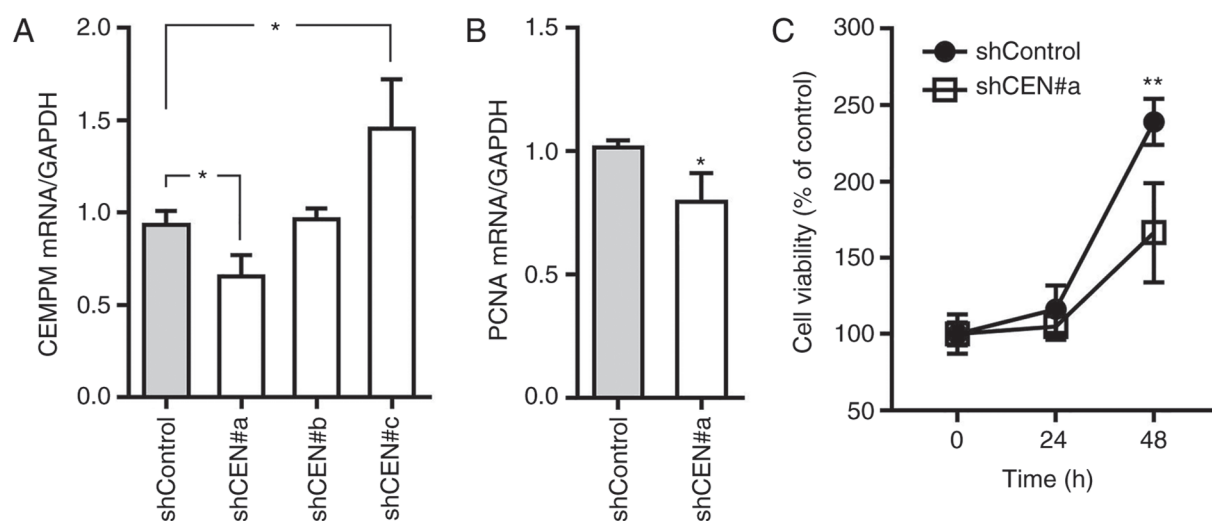

Figure S4. CENPM had little impact on the migration of MCF7 cells. MCF7 cells ( $1 \times 10^6$ ) were transfected with control-(pIRES2-EGFP) or CENPM-overexpression vectors for 12 h, scraped with 200- $\mu$ l pipette tips, washed with PBS, and grown in medium with (A) 1% or (B) 5% FBS for 48 h (n=3). CENPM, centromere protein M.

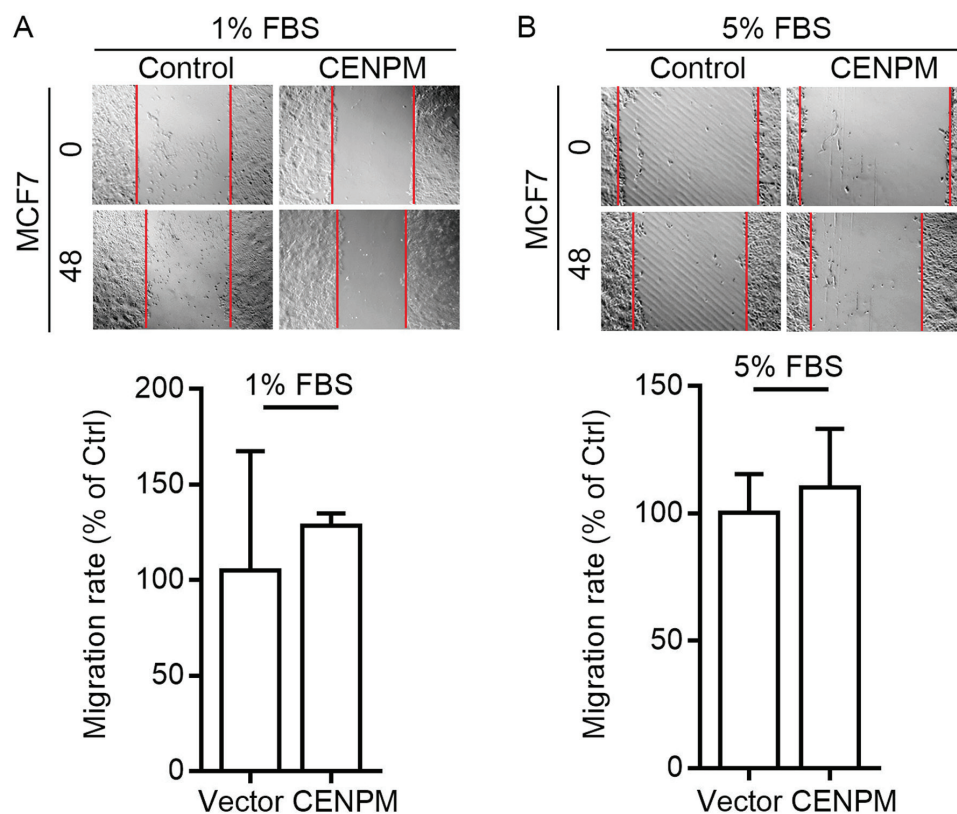

Supplement: Supplementary file 1 [file downloadSupplementary]
